# Supplementary material for: Skeletal Markers of Physiological Stress as Indicators of Structural Violence: A Comparative Study between the Deceased Migrants of the Mediterranean Sea and the CAL Milano Cemetery Skeletal Collection
Source: MDPI journal article supplement (doi:10.3390/biology12020335), 2023-02-20
Supplement: s1 [file s1]

**Supplementary Table S1:** scoring details on the « reduced » migrant sample of 25 individuals and non-migrant sample (values in red indicate higher or lower values than the mean average at 95% confidence, showing scores 3 in the migrant sample and score 2 for CO in the non-migrant sample as unusually high)

| Sample                         | Individual | Score CO | z-score | Score PH | z-score | n° teeth with LEH (dental notation ISO 3950)       |
|--------------------------------|------------|----------|---------|----------|---------|----------------------------------------------------|
| "Reduced"<br>migrant<br>sample | 421        | -        | -       | 2        | 0,23    | -                                                  |
|                                | 423        | -        | -       | 2        | 0,23    | -                                                  |
|                                | 424        | 2        | 0,96    | 2        | 0,23    | -                                                  |
|                                | 427        | 2        | 0,96    | 2        | 0,23    | -                                                  |
|                                | 428        | -        | -       | 1        | -1,67   | -                                                  |
|                                | 431        | 1        | -0,08   | 2        | 0,23    | -                                                  |
|                                | 432        | 2        | 0,96    | 2        | 0,23    | -                                                  |
|                                | 433 C1     | 2        | 0,96    | 2        | 0,23    | -                                                  |
|                                | 433 C2     | -        | -       | 2        | 0,23    | 18                                                 |
|                                | 433 C3     | 1        | -0,08   | 1        | -1,67   | -                                                  |
|                                | 433 C4     | -        | -1,13   | 2        | 0,23    | -                                                  |
|                                | 434        | 1        | -0,08   | 2        | 0,23    | -                                                  |
|                                | 436        | 1        | -0,08   | 2        | 0,23    | -                                                  |
|                                | 437        | -        | -       | 2        | 0,23    | -                                                  |
|                                | 438 C      | -        | -       | 1        | -1,67   | 11-14-17-21-22-23-24-25-27-32-33-35-36-43-44-45-46 |
|                                | 439        | 2        | 0,96    | 2        | 0,23    | 11-12-13-21                                        |
|                                | 441 C1     | 1        | -0,08   | 2        | 0,23    | -                                                  |
|                                | 441 C2     | 1        | -0,08   | 3        | 2,13    | -                                                  |
|                                | 442        | -        | -       | 2        | 0,23    | -                                                  |
|                                | 451        | 1        | -0,08   | 2        | 0,23    | -                                                  |
|                                | 454        | 2        | 0,96    | 2        | 0,23    | 16-26                                              |
|                                | 458 C1     | 1        | -0,08   | 2        | 0,23    | 23-24-25                                           |
|                                | 458 C2     | 3        | 2,01    | 3        | 2,13    | -                                                  |
|                                | 458 C3     | 1        | -0,08   | 1        | -1,67   | -                                                  |
|                                | 458 C4     | 3        | 2,01    | 1        | -1,67   | 13                                                 |
| Non-migrant<br>sample          | 27         | -        | -       | 1        | -0,52   | -                                                  |
|                                | 185        | -        | -       | 1        | -0,52   | -                                                  |
|                                | 347        | 2        | 3,13    | 1        | -0,52   | -                                                  |
|                                | 409        | 1        | 1,31    | 1        | -0,52   | -                                                  |
|                                | 434        | -        | -       | 1        | -0,52   | -                                                  |
|                                | 475        | -        | -       | 2        | 1,33    | -                                                  |
|                                | 483        | -        | -       | 1        | -0,52   | -                                                  |
|                                | 487        | -        | -       | 1        | -0,52   | -                                                  |
|                                | 541        | 1        | 1,31    | 2        | 1,33    | -                                                  |
|                                | 548        | -        | -       | 2        | 1,33    | -                                                  |

|  |      |   |      |   |       |                            |
|--|------|---|------|---|-------|----------------------------|
|  | 576  | - | -    | 1 | -0,52 | -                          |
|  | 774  | - | -    | 1 | -0,52 | -                          |
|  | 794  | 1 | 1,31 | 1 | -0,52 |                            |
|  | 855  | - | -    | - | -     | -                          |
|  | 857  | - | -    | 1 | -0,52 | -                          |
|  | 1213 | - | -    | 1 | -0,52 | -                          |
|  | 1219 | - | -    | 2 | 1,33  | -                          |
|  | 1251 | - | -    | 2 | 1,33  | -                          |
|  | 1253 | 1 | 1,31 | 2 | 1,33  | -                          |
|  | 1254 | - | -    | 1 | -0,52 | -                          |
|  | 1255 | - | -    | 1 | -0,52 | 16-26-42                   |
|  | 1259 | 1 | 1,31 | 2 | 1,33  | 15-27-33-34-35-41-42-43-47 |
|  | 1260 | - | -    | 1 | -0,52 | 21                         |
|  | 1261 | - | -    | 2 | 1,33  | -                          |
|  | 1343 | - | -    | 1 | -0,52 | 33-43                      |
